# Supplementary material
Source: PubMed Central journal article supplement (PMC5005468)
Supplement: mmc1.pdf [file mmc1.pdf]

**Supplemental Data**

**Bi-allelic Mutations in *KLHL7* Cause  
a Crisponi/CISS1-like Phenotype Associated  
with Early-Onset Retinitis Pigmentosa**

**Andrea Angius, Paolo Uva, Insa Buers, Manuela Oppo, Alessandro Puddu, Stefano Onano, Ivana Persico, Angela Loi, Loredana Marcia, Wolfgang Höhne, Gianmauro Cuccuru, Giorgio Fotia, Manila Deiana, Mara Marongiu, Hatice Tuba Atalay, Sibel Inan, Osama El Assy, Leo M.E. Smit, Ilyas Okur, Koray Boduroglu, Gülen Eda Utine, Esra Kılıç, Giuseppe Zampino, Giangiorgio Crisponi, Laura Crisponi, and Frank Rutsch**

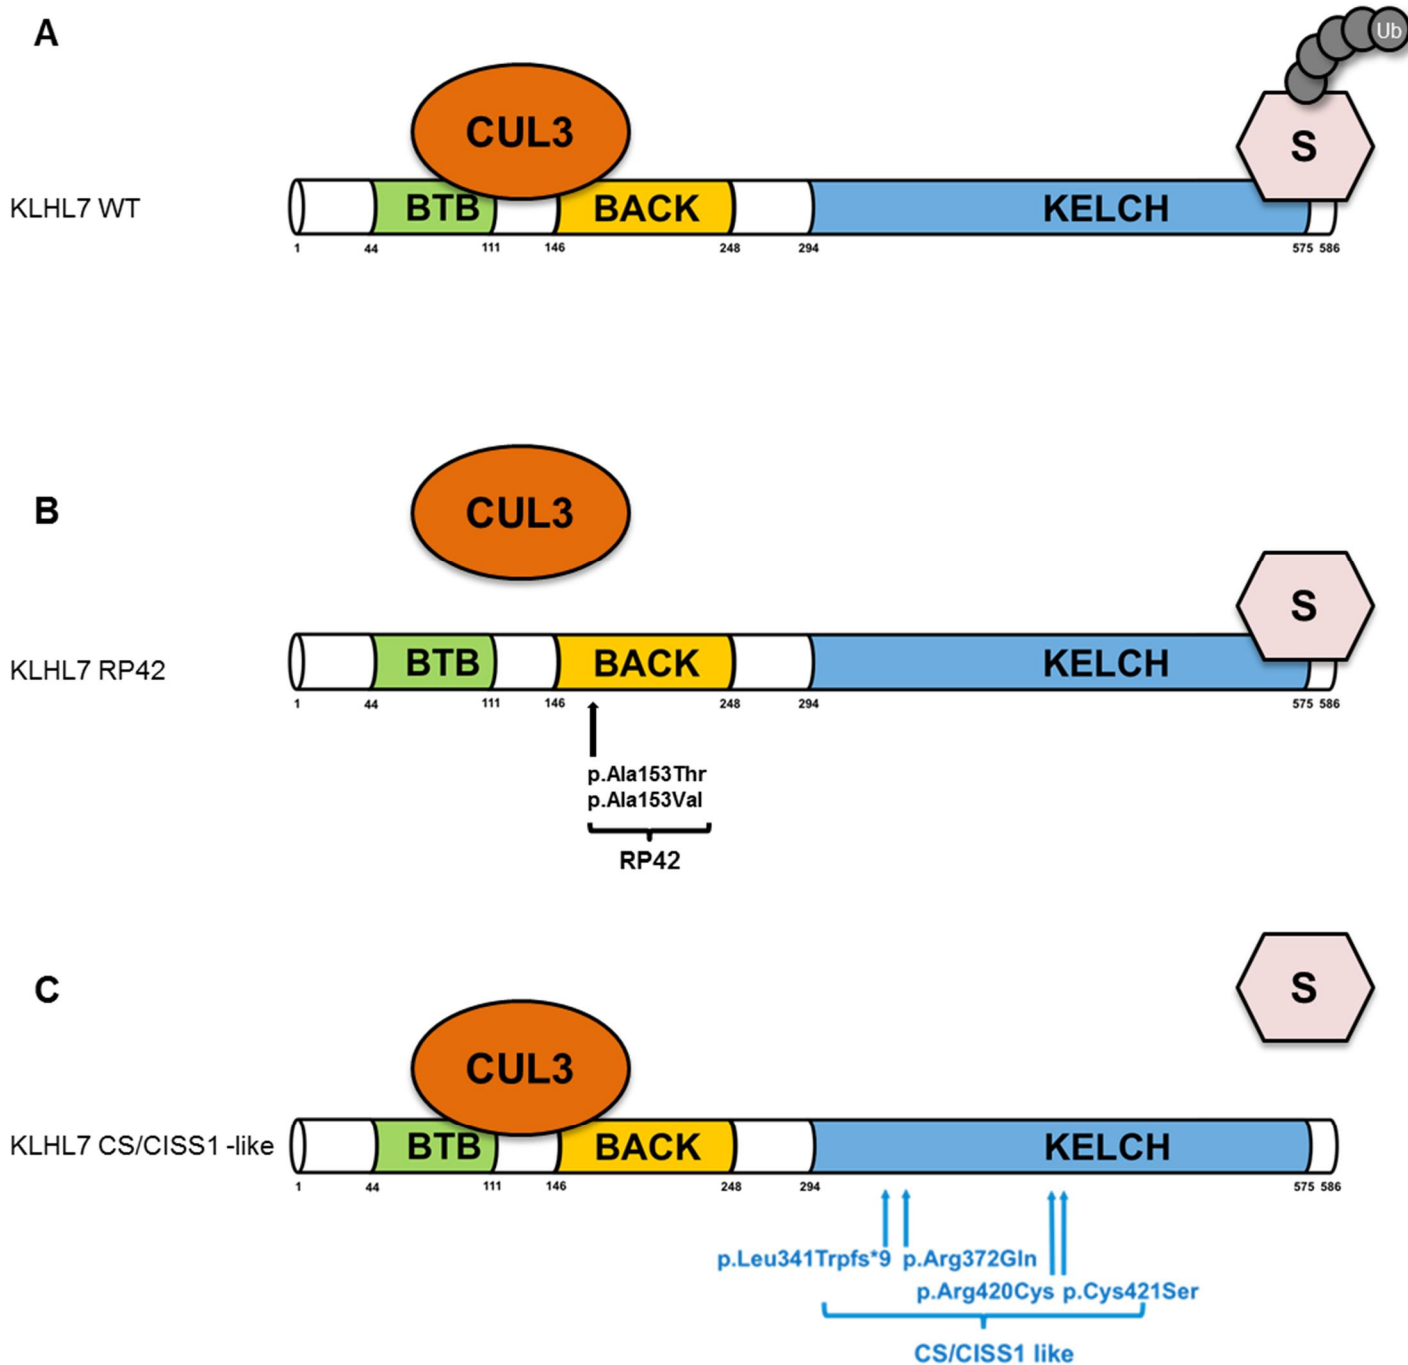

**Figure S1: Proposed pathomechanism of KLHL7 mutations in adRP and Crisponi/CISS1-like phenotype.** (A) In KLHL7 WT, CUL3 binds to the protein via the BTB/BACK domain and the target substrate(s) that bind to the Kelch domain are ubiquitinated and degraded by proteasome. (B) In KLHL7 mutated in adRP, CUL3 does not bind to the protein, and the target substrate(s) that bind to the Kelch domain are not ubiquitinated and accumulate. (C) In KLHL7 mutated in CS/CISS1 like, CUL3 binds to the protein while the target substrate(s) could not bind to the Kelch domain and are not ubiquitinated and accumulate.

**Table S1. Number of variants identified in the whole exome sequencing.**

|                                                                                                                                                | <b>CS - Fam C</b> | <b>CS - Fam F</b> | <b>CS - Fam G</b> |
|------------------------------------------------------------------------------------------------------------------------------------------------|-------------------|-------------------|-------------------|
| <b>Annotated variants</b>                                                                                                                      | 178148            | 194431            | 127389            |
| <b>Total high quality variants in the family<br/>(GATK Hard Filters PASS Variants)</b>                                                         | 165377            | 174850            | 118995            |
| <b>Filtered by MAF</b>                                                                                                                         | 19226             | 22314             | 11023             |
| <b>Filtered by feature<br/>(frameshift - nonframeshift - startloss -<br/>stoploss - stopgain - splicing2bp -<br/>missense - 3'UTR - 5'UTR)</b> | 7397              | 7800              | 4246              |
| <b>Filtered by feature (No UTRs)</b>                                                                                                           | 1792              | 1946              | 941               |
| <b>Filtered by autosomal recessive model</b>                                                                                                   | 80                | 42                | 250               |
| <b>Recessive homozygotes</b>                                                                                                                   | 50                | 27                | 82                |
| <b>Heterozygous compound</b>                                                                                                                   | 30                | 15                | 168               |
| <b>Filtered by false positives</b>                                                                                                             | 68                | 37                | 202               |
| <b>Novel variants (No rs)</b>                                                                                                                  | 20                | 12                | 52                |
| <b>Candidate gene(s)</b>                                                                                                                       | 1                 | 1                 | 1                 |

**Table S2. Pathogenicity score of the three missense mutations found**

| <b>Family code</b>        | <b>CS Ę Fam C</b>        | <b>CS Ę Fam G</b> | <b>CS Ę Fam L</b> |
|---------------------------|--------------------------|-------------------|-------------------|
| <b>Proband code</b>       | CS_144                   | CS_260            | CS_169            |
| <b>Chromosome</b>         | 7:23207538               | 7:23207535        | 7:23205495        |
| <b>Gene</b>               | <i>KLHL7</i>             | <i>KLHL7</i>      | <i>KLHL7</i>      |
| <b>DNA change</b>         | c.1261T>A                | c.1258C>T         | c.1115G>A         |
| <b>aa change</b>          | p.Cys421Ser              | p.Arg420Cys       | p.Arg372Gln       |
| <b>dbSNP (rsID)</b>       | no rs                    | rs780705654       | no rs             |
| <b>SIFT</b>               | Tolerated                | Damaging          | Damaging          |
| <b>PolyPhen-HDIV_pred</b> | Probably damaging/Benign | Probably damaging | Probably damaging |
| <b>PolyPhen-HVAR_pred</b> | Probably damaging/Benign | Probably damaging | Probably damaging |
| <b>LRT</b>                | Damaging                 | Damaging          | Damaging          |
| <b>MutationTaster</b>     | Disease causing          | Disease causing   | Disease causing   |
| <b>MutationAssessor</b>   | Neutral                  | High              | Medium            |
| <b>FATHMM</b>             | Tolerated                | Deleterious       | Tolerated         |
