# Supplementary material
Source: PubMed Central journal article supplement (PMC5005468)
Supplement: mmc2.pdf [file mmc2.pdf]

## Bi-allelic Mutations in *KLHL7* Cause a Crisponi/CISS1-like Phenotype Associated with Early-Onset Retinitis Pigmentosa

Andrea Angius,<sup>1,15</sup> Paolo Uva,<sup>2,15</sup> Insa Buers,<sup>3</sup> Manuela Oppo,<sup>1,4</sup> Alessandro Puddu,<sup>1</sup> Stefano Onano,<sup>1,4</sup> Ivana Persico,<sup>1</sup> Angela Loi,<sup>1</sup> Loredana Marcia,<sup>1,4</sup> Wolfgang Höhne,<sup>5</sup> Gianmauro Cuccuru,<sup>2</sup> Giorgio Fotia,<sup>2</sup> Manila Deiana,<sup>1</sup> Mara Marongiu,<sup>1</sup> Hatice Tuba Atalay,<sup>6</sup> Sibel Inan,<sup>7</sup> Osama El Assy,<sup>8</sup> Leo M.E. Smit,<sup>9</sup> Ilyas Okur,<sup>10</sup> Koray Boduroglu,<sup>11</sup> Gülen Eda Utine,<sup>11</sup> Esra Kılıç,<sup>12</sup> Giuseppe Zampino,<sup>13</sup> Giangiorgio Crisponi,<sup>14</sup> Laura Crisponi,<sup>1,16,\*</sup> and Frank Rutsch<sup>3,16</sup>

Crisponi syndrome (CS)/cold-induced sweating syndrome type 1 (CISS1) is a very rare autosomal-recessive disorder characterized by a complex phenotype with high neonatal lethality, associated with the following main clinical features: hyperthermia and feeding difficulties in the neonatal period, scoliosis, and paradoxical sweating induced by cold since early childhood. CS/CISS1 can be caused by mutations in the cytokine receptor-like factor 1 (*CRLF1*). However, the physiopathological role of *CRLF1* is still poorly understood. A subset of CS/CISS1 cases remain yet genetically unexplained after *CRLF1* sequencing. In five of them, exome sequencing and targeted Sanger sequencing identified four homozygous disease-causing mutations in kelch-like family member 7 (*KLHL7*), affecting the Kelch domains of the protein. *KLHL7* encodes a BTB-Kelch-related protein involved in the ubiquitination of target proteins for proteasome-mediated degradation. Mono-allelic substitutions in other domains of *KLHL7* have been reported in three families affected by a late-onset form of autosomal-dominant retinitis pigmentosa. Retinitis pigmentosa was also present in two surviving children reported here carrying bi-allelic *KLHL7* mutations. *KLHL7* mutations are thus associated with a more severe phenotype in recessive than in dominant cases. Although these data further support the pathogenic role of *KLHL7* mutations in a CS/CISS1-like phenotype, they do not explain all their clinical manifestations and highlight the high phenotypic heterogeneity associated with mutations in *KLHL7*.

Crisponi syndrome (CS)/cold-induced sweating syndrome type 1 (CISS1 [MIM: 272430]) is a rare autosomal-recessive disorder, known to be caused by mutations in *CRLF1*, encoding for the cytokine receptor-like factor-1 (*CRLF1* [MIM: 604237]).<sup>1,2</sup> CS/CISS1 usually manifests in the neonatal period, when individuals present with hyperthermia and abnormal paroxysmal contractions of the facial and oropharyngeal muscles, as well as feeding and respiratory difficulties, often requiring the use of nasogastric feeding. Physical dysmorphism including a large face, broad nose, and camptodactyly have been described in most of CS/CISS1-affected individuals. Hyperthermia and acute respiratory crises are frequently associated with death within the first months of life. In the surviving CS/CISS1 case subjects, although feeding difficulties and hyperthermia often resolve after infancy, the development of scoliosis and sometimes psychomotor retardation occur, along with paradoxical sweating at cold ambient temperatures with onset at 3 years of age. Recently, a new family of

“CNTF receptor-related disorders” was termed, comprising CS/CISS1, cold-induced sweating syndrome type 2 (CISS2 [MIM: 610313]) due to mutations in cardiotrophin-like cytokine factor 1 (*CLCF1* [MIM: 607672]), and Stüve-Wiedemann syndrome (SWS [MIM: 601559]) due to mutations in leukemia inhibitory factor receptor (*LIFR* [MIM: 151443]), all showing overlapping clinical features.<sup>1</sup> *CRLF1* and *CLCF1* proteins are involved in the ciliary neurotrophic factor (CNTF)-receptor pathway, important for embryonic development and maintenance of the nervous system.<sup>3</sup> This pathway supports the differentiation and survival of a wide range of neural cell types during development and in adulthood. The stable heterodimeric complex of *CRLF1* and *CLCF1* forms a ligand for CNTFR, which, along with gp130 and *LIFR*, comprise the CNTF-receptor complex. Binding of *CRLF1/CLCF1* to CNTFR leads to dimerization of gp130/*LIFR*, which in turn induces downstream signaling events, including activation of the JAK1/STAT3 pathway.<sup>4</sup>

<sup>1</sup>Istituto di Ricerca Genetica e Biomedica, Consiglio Nazionale delle Ricerche (CNR), Monserrato, 09042 Cagliari, Italy; <sup>2</sup>Centre for Advanced Studies, Research and Development in Sardinia (CRS4), Science and Technology Park Polaris, 09010 Pula, Italy; <sup>3</sup>Department of General Pediatrics, Münster University Children's Hospital, 48149 Münster, Germany; <sup>4</sup>Dipartimento di Scienze Biomediche, Università degli Studi di Sassari, 07100 Sassari, Italy; <sup>5</sup>Cologne Center for Genomics (CCG), University of Cologne, 50931 Cologne, Germany; <sup>6</sup>Department of Ophthalmology, Gazi University School of Medicine, 06560 Ankara, Turkey; <sup>7</sup>Ophthalmology Department of Afyon Kocatepe University, 03200 Afyon, Turkey; <sup>8</sup>Pediatric Department-SCBU, Dibba Hospital, 11414 Dibba Al Fujaira, United Arab of Emirates; <sup>9</sup>Haga Ziekenhuis Den Haag, Department of Neurology, Leyweg 275, 2545 CH Den Haag, the Netherlands; <sup>10</sup>Department of Pediatric Nutrition and Metabolism, Gazi University Medical School, 06500 Ankara, Turkey; <sup>11</sup>Department of Pediatrics, Division of Pediatric Genetics, Hacettepe University, Faculty of Medicine, 06100 Ankara, Turkey; <sup>12</sup>Pediatric Genetics, Pediatric Hematology Oncology Research & Training Hospital, 06110 Ankara, Turkey; <sup>13</sup>Istituto di Pediatria, Policlinico “A. Gemelli,” Università Cattolica del S. Cuore, 00168 Rome, Italy; <sup>14</sup>Clinica Sant'Anna, 09127 Cagliari, Italy

<sup>15</sup>These authors contributed equally to this work

<sup>16</sup>These authors jointly supervised this work

\*Correspondence: [laura.crisponi@irgb.cnr.it](mailto:laura.crisponi@irgb.cnr.it)  
<http://dx.doi.org/10.1016/j.ajhg.2016.05.026>

© 2016 American Society of Human Genetics.

To date, 35 distinct *CRLF1* mutations have been found overall either as homozygous or compound heterozygous sequence changes in 56 CS/CISS1 case subjects.<sup>5</sup> Although the identification of mutations in *CRLF1* provides a definite diagnosis in subjects with suspected diagnosis of CS/CISS1 syndrome, a subset of suspected cases remains yet genetically unexplained after sequencing of *CRLF1*. Among the 64 case subjects referred to our center with a suspected clinical diagnosis of CS/CISS1 between 2007 and 2014, molecular genetic tests failed to detect mutations in *CRLF1* in 25 case subjects with the method employed. In the present study, we ranked these case subjects based on their phenotype similarity to CS/CISS1. We focused on the infantile phenotype and in particular on the four main typical CS criteria: hyperthermia in the first months of life, feeding difficulties, contraction of oropharyngeal muscles, and camptodactyly. This allowed us to assign the 25 suspected CS/CISS1 case subjects to the following ranks: (1) very likely: 9 individuals (2 sibs), who fulfilled all of the four main criteria; (2) questionable: 14 individuals who fulfilled two or three of them; or (3) unlikely: 2 individuals who fulfilled only one of main typical CS criteria. Subjects assigned to rank 1 and their parents, where available, were selected for exome sequencing. Individuals within the rank 1 group were further prioritized for the exome analysis based on consanguinity. This allowed us to identify five individuals (CS\_144, CS\_258, CS\_259, CS\_260, and CS\_267) from four families (all of Turkish origin) as the top ranked candidates on whom we performed the exome analysis. All participants (proband and parents) provided written informed consent to participate in this study according to a protocol reviewed and approved by the institutional review board at the Münster University Hospital Ethical Committee in Germany.

Genomic DNA was extracted from whole blood samples and sheared by sonication or tagmentation, and sequencing libraries were prepared using the TruSeq DNA Library Preparation Kit and Truseq Exome Enrichment kit or Nextera Rapid Capture Expanded Exome Kit (Illumina) according to manufacturer instructions. Libraries were loaded into Paired Ends v3 flow cells on an Illumina cBot followed by indexed paired-end sequencing (101+7+101 bp) on a HiSeq 2000 using SBS Kit v3 chemistry (Illumina). Success of tagmentation and quality of post-amplification libraries were assessed using DNA-1000 chips on the BioAnalyzer 2100 (Agilent) and Qubit fluorimetric quantitation using Qubit dsDNA BR Assay Kits (Invitrogen).

This approach achieved a 80× average coverage over the 62 Mb of genomic regions sequenced, with more than 95% regions covered. The observed transition to transversion rate (Ti/Tv) was 2.2, according to what is expected for expanded exome capture kit. Data analysis has been performed using an analysis pipeline implemented in OriGene.<sup>6</sup> In brief, paired-end sequence reads were aligned to the human genome (hg19) with the Burrows-Wheeler Aligner (BWA v.0.7.5a)<sup>7</sup> using default settings. Initial map-

pings were processed using the GATK framework (v.2.8.1)<sup>8</sup> according to their Best Practices recommendations.<sup>9</sup> Variant sites were identified using GATK Unified Genotyper module. Variants were classified as known or novel based on dbSNP146 and annotated using GATK Variant Annotator, SnpSift/SnpEff,<sup>10</sup> and KGGSeq.<sup>11</sup> Annotations included positions in UCSC, RefGene, GENCODE, and ENSEMBL transcripts, OMIM and ClinVar annotations, potential false positive signals,<sup>12</sup> allele frequency in dbSNP, ESP6500 (release SI-V2), 1000 Genomes Project (release 05/2013), and ExAC, functional predictions for the amino-acid changes according to different models (SIFT, PolyPhen2, LRT, MutationTaster, MutationAssessor, and FATHMM) retrieved from dbNSFP v.2.9 (database of human nonsynonymous SNPs and their functional predictions).<sup>13</sup> Regions of homozygosity were identified by H3M2.<sup>14</sup> Variants were filtered according to variant and genotype quality, recessive pattern of inheritance, gene feature (frameshift, non frameshift, stop loss/gain, splicing, missense) and MAF < 1% in reference databases (dbSNP138, dbSNP141, 1000 Genomes, ESP6500, ExAC, and an in-house database of 300 sequenced individuals). The numbers of variants remaining after filtering are provided in Table S1.

Before starting the analysis of the exome data, we rechecked for pathogenic variants in *CRLF1* as well as in *CLCF1* and *LIFR*, all belonging to the family of the “CNTF receptor-related disorders.” We also looked for variants in *CNTFR*. All these genes were efficiently covered by probes except for *CRLF1* exon 1. We also looked at possible CNVs in these loci. For this analysis we employed the CoNIFER pipeline<sup>15</sup> using as input the same BAM files of the SNVs pipeline. The samples, and 67 control exomes, were analyzed simultaneously (SVD [singular value decomposition] = 2) and scanned particularly to find CNVs. The CNV calls were annotated with the pathogenicity info from ClinGen database through a custom script. The results of these analyses allowed us to exclude their involvement in the disorder. Successively, extending the analysis to the whole-exome data, we identified a common gene in three out of the four families, kelch-like family member 7 (*KLHL7* [MIM: 611119]; GenBank: NM\_001031710.2), harboring the following private and potential deleterious mutations, all in homozygous state: M1 (c.1261T>A [p.Cys421Ser]) in family C, M2 (c.1022delT [p.Leu341Trpfs\*9]) in family F, and M3 (c.1258C>T [p.Arg420Cys]) in family G (Figure 1). All variants were confirmed by Sanger sequencing in all the family members and were absent in the Geno2MP database containing data from ~5,000 individuals, including both persons affected with a Mendelian condition and unaffected individuals who are relatives of persons with a Mendelian condition. The variant M3 (c.1258C>T [p.Arg420Cys]) in family G was present as rs780705654 in dbSNP146 and in ExAC with 2 heterozygotes (1 East Asian, 1 European non-Finnish) on 121,411 total alleles (C 0.99998355; T 0.00001647). To further investigate the

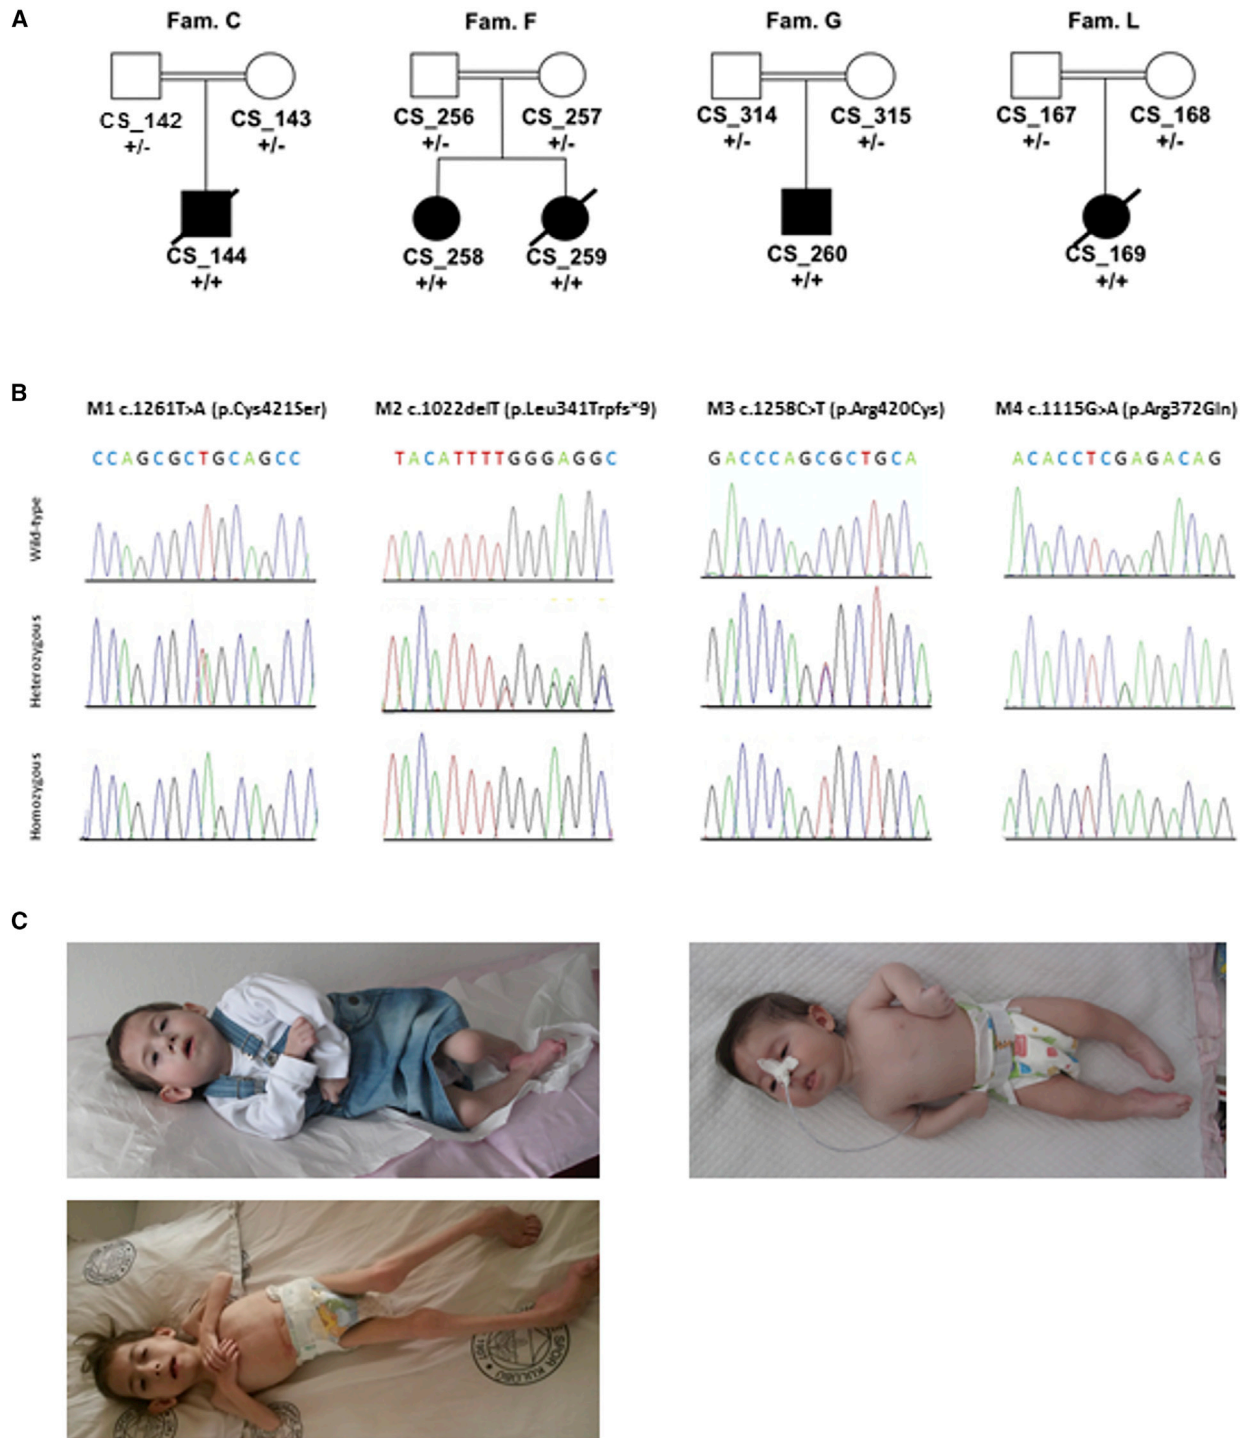

**Figure 1. Rank 1 Families Selected for Exome Sequencing and Sanger Sequencing of the Four *KLHL7* Mutations Found**

(A) Family pedigrees of individuals with *KLHL7* mutations. Symbols and colors are defined as follows: square, male; circle, female; white, unaffected; dot, unaffected carrier; black, affected.

(B) Sanger sequencing of four *KLHL7* mutations found in the four Turkish consanguineous families. Mutation status of *KLHL7* is indicated beneath symbols for each subject: +/-, heterozygous carriers; +/+, homozygous for *KLHL7* mutation. Panels shows wild-type, heterozygous, and homozygous status for M1 (c.1261T>A [p.Cys421Ser]), M2 (c.1022delT [p.Leu341Trpfs\*9]), M3 (c.1258C>T [p.Arg420Cys]), and M4 (c.1115G>A [p.Arg372Gln]), respectively.

(C) Clinical features of CS\_258 (top left at the age of 3 years and 10 months and bottom left at the age of 7 years old) and CS\_259 (right at the age of 5 months) from family F. Written informed consent for publication of their clinical images was obtained from their parent.

**Table 1. Clinical and Mutational Findings in Five Individuals with a CS/CISS1-like Phenotype Associated with Bi-allelic Mutations in *KLHL7***

| Family                               | C                                 | F                                      | F                                      | G                                 | L                                 |
|--------------------------------------|-----------------------------------|----------------------------------------|----------------------------------------|-----------------------------------|-----------------------------------|
| Individual code                      | CS_144                            | CS_258                                 | CS_259                                 | CS_260                            | CS_169                            |
| Sex                                  | F                                 | F                                      | F                                      | M                                 | M                                 |
| Age at diagnosis                     | 7 months                          | 4 years                                | 6 months                               | 11 months                         | 5.5 months                        |
| Ethnic origin                        | Turkey                            | Turkey                                 | Turkey                                 | Turkey                            | Turkey                            |
| Age at death                         | 21 months                         |                                        | 24 months                              |                                   | 7 months                          |
| Consanguinity                        | yes                               | yes                                    | yes                                    | yes                               | yes                               |
| Hyperthermia                         | +                                 | +                                      | ?                                      | +                                 | –                                 |
| Contraction of oropharyngeal muscles | +                                 | +                                      | +                                      | +                                 | +                                 |
| Feeding difficulties                 | +                                 | +                                      | +                                      | +                                 | +                                 |
| Camptodactyly                        | +                                 | +                                      | +                                      | +                                 | +                                 |
| Retinitis pigmentosa                 | – (12 mo)                         | + (6 years)                            | NA                                     | + (4 years)                       | NA                                |
| Cyanosis                             | –                                 | –                                      | +                                      | –                                 | –                                 |
| Swallowing difficulties              | +                                 | +                                      | +                                      | +                                 | +                                 |
| Full cheeks                          | –                                 | +                                      | +                                      | +                                 | +                                 |
| Foot anomalies                       | ?                                 | +                                      | –                                      | NA                                | +                                 |
| Highly arched palate                 | +                                 | +                                      | +                                      |                                   | +                                 |
| Depressed nasal bridge               | +                                 | +                                      | +                                      | +                                 | +                                 |
| Cold-induced sweating                | –                                 | +                                      | –                                      | –                                 | –                                 |
| Scoliosis                            | –                                 | –                                      | –                                      | NA                                | –                                 |
| Joint contractures                   | +                                 | +                                      | +                                      | NA                                | –                                 |
| Psychomotor retardation              | NA                                | –                                      | –                                      | NA                                | +                                 |
| <i>KLHL7</i> mutation                | exon9: c.1261T>A<br>(p.Cys421Ser) | exon8: c.1022delT<br>(p.Leu341Trpfs*9) | exon8: c.1022delT<br>(p.Leu341Trpfs*9) | exon9: c.1258C>T<br>(p.Arg420Cys) | exon8: c.1115G>A<br>(p.Arg372Gln) |

Abbreviation is as follows: NA, not available.

contribution of *KLHL7* to the total genetic load of CS/CISS1-like phenotype, we analyzed the 20 remaining samples of the entire cohort of case subjects with no mutations detected in *CRLF1* (rank 1, 2, and 3). We analyzed all the coding sequence and intron-exon junctions of *KLHL7* with Big Dye Terminator Ready Reaction Mix according to the manufacturer's (Thermo Fisher Scientific) instructions. All the primer pairs used for Sanger sequencing were the same reported in Friedman et al.<sup>16</sup> We identified one additional *KLHL7* missense variant, M4 (c.1115G>A [p.Arg372Gln]) in the affected individual from family L, belonging to the rank 2 group. All families carrying mutations in *KLHL7* were of Turkish origin and consanguineous (Table 1). All the parents were found to be heterozygous carriers (Figure 1B). Clinical features of the two sisters CS\_258 and CS\_259 from family F are depicted in Figure 1C. Considering that the CS/CISS1 cohort consists of 64 case subjects clustered in 60 families, the fraction of cases caused by *KLHL7* mutations is around 6.7%.

Mutations in *KLHL7* have recently been reported to cause an autosomal-dominant form of retinitis pigmentosa

(adRP) (RP42 [MIM: 612943]), preferentially affecting the rod photoreceptors.<sup>16</sup> Through linkage analysis and subsequent mutation screening, three disease-causing substitutions have been identified: c.449G>A (p.Ser150Asn), c.457G>A (p.Ala153Thr), and c.458C>T (p.Ala153Val) (Figure 2A). A detailed phenotypic characterization with long-term follow up of 11 individuals from a large family with the c.458C>T (p.Ala153Val) mutation revealed a phenotype with a varying degree of retinal photoreceptor dysfunction, with a late onset in some members and slow progression.<sup>17</sup> A consecutive study reported that the visual phenotype is similar among individuals with these mutations. Late onset (beyond 50 years of age), slow progression, strong retention of foveal function, and bilateral concentric constriction of the visual fields with far periphery sparing may guide mutation screening in adRP.<sup>18</sup>

*KLHL7* encodes a 586-aa BTB-Kelch-related protein, containing one BTB and BACK and one Kelch domain (also known as Kelch repeat  $\beta$ -propeller domain), the latter consisting of six Kelch motifs (UniProtKB: Q8IXQ5; Figure 2A). *KLHL7* has been recently identified as a novel



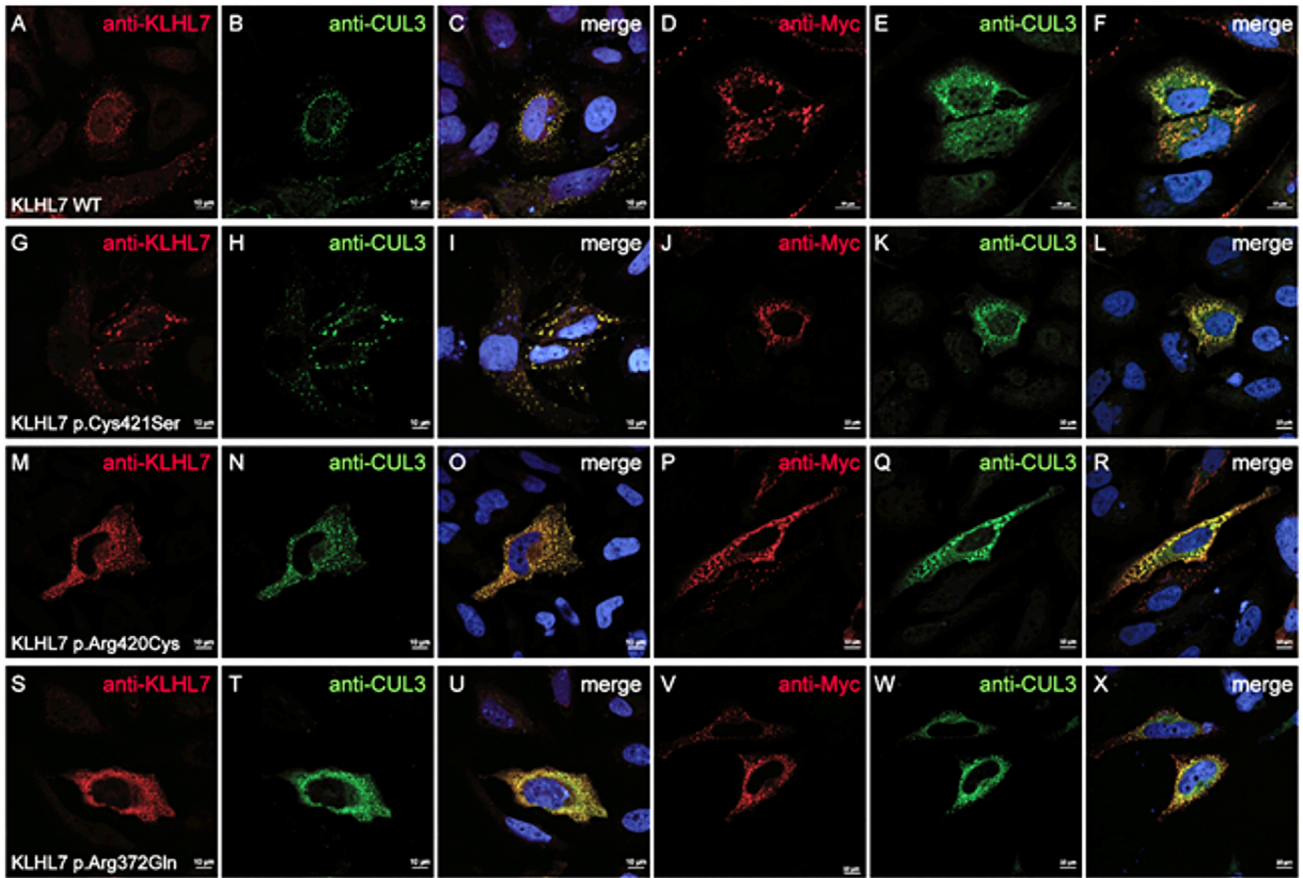

Y

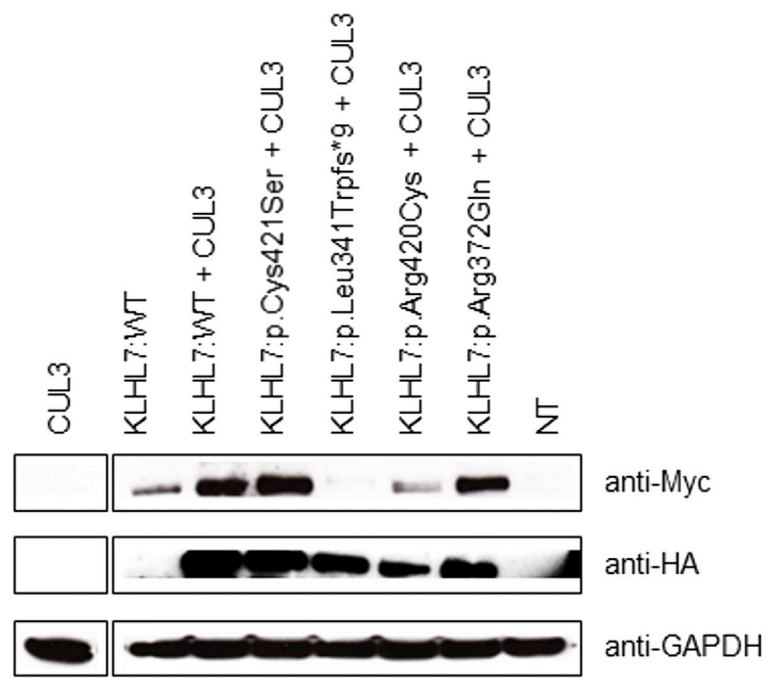

**Figure 3. Subcellular Localization of the KLHL7 Mutants Found in CS/CISS1 Phenotype and Their Co-localization with CUL3**  
 (A–X) HeLa cells cultured on coverslips were transfected with plasmids encoding either KLHL7:WT (A–F), KLHL7:p.Cys421Ser (G–L), KLHL7:p.Arg420Cys (M–R), KLHL7:p.Arg372Gln (S–X), and HA-CUL3 (kindly donated by Prof. Chiba). The cells were then fixed and stained with either anti-KLHL7 (Abnova Corp., cat# H00055975-B01P, RRID: AB\_1576675; dilution 1:200) or anti-Myc (Abcam cat# ab18185, RRID: AB\_444307; dilution 1:1,000) and anti-CUL3 antibodies (Bethyl cat# A301-109A, RRID: AB\_873023; dilution 1:250).  
*(legend continued on next page)*

interaction and co-localization with CUL3, in a dominant-negative manner with reduced E3 ligase activity.<sup>19</sup> In contrast, the four variants here found associated with the phenotype under study are located close to or within the Kelch domain, which should not be required for CUL3 binding according to Kigoshi et al. (Figure 2A).<sup>19</sup>

To identify a potential disease-causing effect of these variants, we investigated their pathogenicity score, species conservation, and predicted impact on the protein structure (Table S2 and Figures 2B and 2C). An inspection of the corresponding positions within the protein structure shows that the p.Leu341Trpfs\*9 substitution results in a premature termination codon and an almost complete loss of the Kelch domain from the protein.

The p.Arg420Cys substitution is situated within a connecting loop between Kelch motifs III and IV. The Arg420 is not exposed to the protein surface. Instead, it forms a salt bridge with Glu452, the carboxyl group of which is within hydrogen bridge distance from the arginine side chain. Those non-exposed internal salt bridges contribute substantially to the stability of the adjacent fold and in this case probably to one of the loop positions that contribute to the specificity of substrate recognition. Loss of this stabilization may result in diminishing or loss of substrate binding or even in lowered or altered specificity due to higher plasticity of this loop. The Arg420 position (together with the Glu452 position) is highly conserved within KLHL7 or KLHL7-like proteins from different organisms, even those very distinct from vertebrates (where KLHL7 sequences are surprisingly conserved as a whole, e.g., 99% between the mammals human and cow and 96% between humans and frog; Figure 2B). Also the corresponding positions in other human KELCH proteins (e.g., KEAP1) are conserved, thus indicating an important function of this salt bridge for proper maintenance of structure and thus most probably of substrate recognition.

The p.Cys421Ser substitution is adjacent to the p.Arg420Cys substitution but in this case, this position is not conserved within the animal kingdom and for the fly, there is even a serine at this position (Figure 2B). This is not very surprising because Ser and Cys behave physically very similarly concerning polarity (with Cys a little less polar than Ser), residue volume, and hydrogen bridge formation potency. In vertebrate KLHL7, this Cys is not involved in a disulfide bridge but forms a hydrogen bridge with Ser395 C = O, which would also be possible for Ser at this position. This Cys421 is partially exposed to the solvent within the binding region of the Kelch domain and could thus influence the substrate binding to some extent.

The situation with p.Arg372Gln is quite similar to p.Arg420Cys: again Arg372 forms an internal electrostatic

interaction (“salt bridge”) in hydrogen bridge distance with Glu401, thus stabilizing a loop between motifs II and III at the Kelch domain surface (Leu366 to Ala376), which connects two  $\beta$  strands of the beta-propeller structure (Figure 2C), which may be involved in protein ligand (“substrate”) recognition. Again, this salt bridge is conserved over a broad range of organisms even at overall low sequence similarity, as it is the case with the fly, plant, or worm sequence, pointing to a strong consequence for local structural situation with a loss of this interaction by exchanging the positively charged arginine by the uncharged glutamine. The fact that all four variants are located within the Kelch domain of KLHL7 supports a role for this domain in the pathogenesis of the CS/CISS1-like phenotype.

Previous immunocytochemical analyses in HeLa cells transfected with plasmids encoding KLHL7:WT (wild-type) and the three KLHL7 mutants associated to adRP showed that p.Ser150Asn has subcellular localization similar to KLHL7:WT in perinuclear punctate structures and co-localizes with CUL3, whereas p.Ala153Val and p.Ala153Thr were more peripheral with no formation of such punctate structures and no prominent co-localization with CUL3.<sup>19</sup> These data have been further confirmed by coIP studies, showing that whereas p.Ser150Asn could interact with CUL3, p.Ala153Val and p.Ala153Thr could not.<sup>19</sup> The CUL3-KLHL7 punctate structures could be inclusion bodies containing target proteins ubiquitinated and degraded by proteasome.<sup>19</sup>

We also investigated the expression and the subcellular localization of the three substitutions found in CS/CISS1-like phenotype and their co-localization with CUL3 (Figure 3). Human DDK-Myc-KLHL7:WT clone (#RC208038 Origene) was mutagenized using the QuickChange Site-Directed Mutagenesis kit (Stratagene) according to the manufacturer’s protocol. Immunocytochemical analyses in HeLa cells transfected with plasmids encoding KLHL7:WT and the KLHL7 mutants associated to a CS/CISS1-like phenotype, alone or in combination with CUL3, followed by confocal microscopy analysis, showed that KLHL7:WT is localized in punctate structures in the cytoplasm around the nucleus as reported also in Kigoshi et al. (Figures 3A–3F)<sup>19</sup> and that KLHL7 mutants have similar subcellular localization as KLHL7:WT (Figures 3G–3X). Furthermore, all KLHL7:WT and mutants co-localize with CUL3 (Figures 3C, 3F, 3I, 3L, 3O, 3R, 3U, and 3X). KLHL7 (c.1022delT [p.Leu341Trpfs\*9]) protein is absent, as seen by western blotting, most likely resulting in nonsense-mediated mRNA decay with a loss of function as a putative disease mechanism (Figure 3Y).

---

The nucleus was stained with DAPI. Confocal microscopy analysis shows KLHL7:WT and mutants in red and CUL3 in green. Scale bars represent 10  $\mu$ m.

(Y) HeLa cells were transfected with plasmids encoding either KLHL7:WT, KLHL7:p.Cys421Ser, KLHL7:p.Leu341Trpfs\*9, KLHL7:p.Arg420Cys, KLHL7:p.Arg372Gln, and HA-CUL3, and the cell lysates were immunoblotted with anti-Myc, anti-HA, and anti-GAPDH. NT = not transfected.

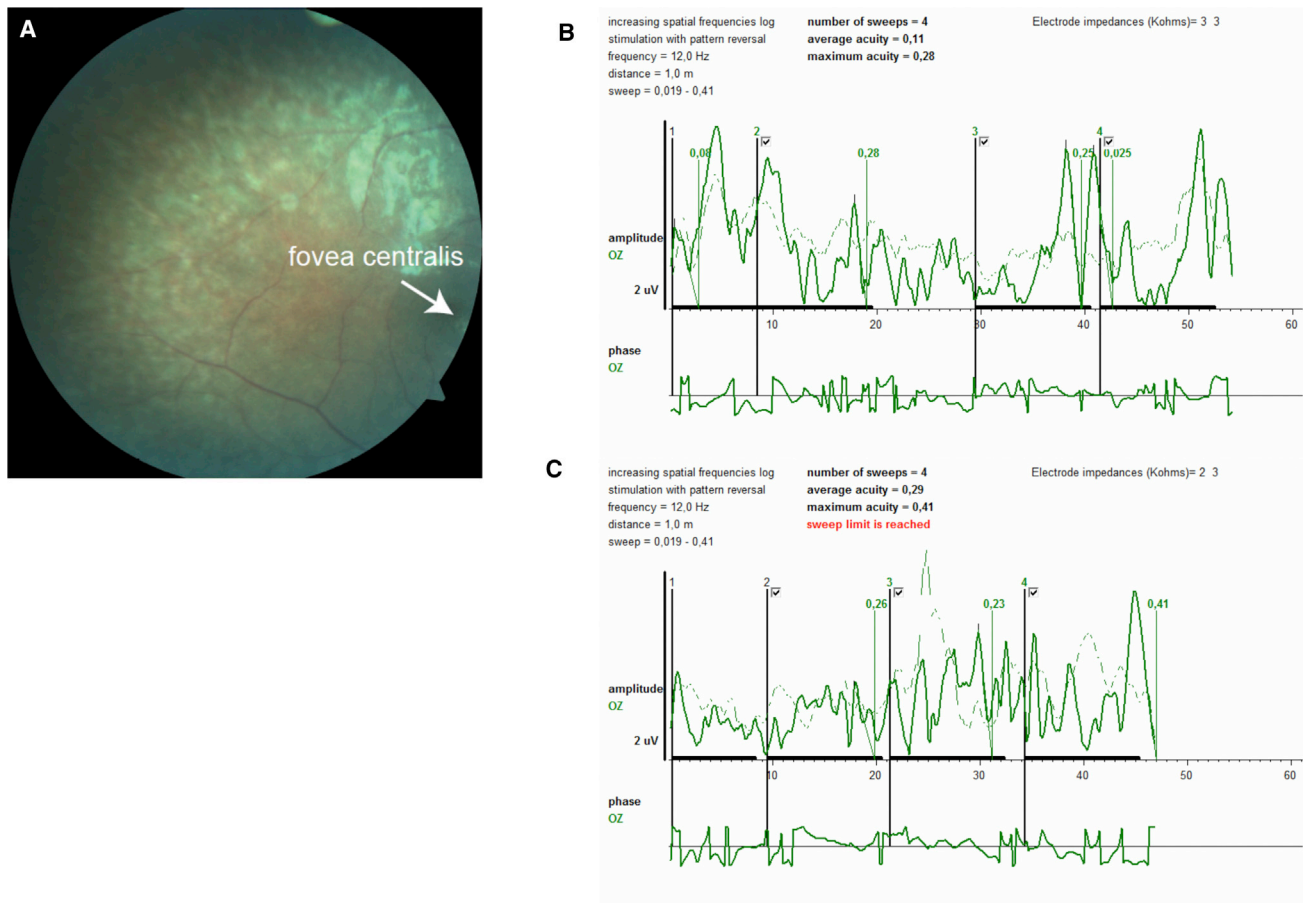

**Figure 4. Pigmentary Retinopathy and Loss of Visual Acuity in CS\_258**

(A) Fundus photography taken by digital Fundus Camera (Carl Zeiss Meditec, VISUCAM 500) showed retinal pigmentary changes, and an abnormal appearance of the macula with attenuated arteriolar vessels (the arrow indicates the fovea centralis).

(B and C) Left (B) and right (C) eye electrophysiological examination done to assess visual function of the proband: sVEP (sweep visual evoked potential) was performed 1 m from the optoelectronic stimulator (Metrovision-Vision Monitor). Potential for mean and maximum visual acuity in both eyes was obtained from sVEP recordings. A VEP produced by a pattern stimulus that is altered at a high temporal frequency rate between 5 and 15 Hz was obtained. Recorded amplitudes were consistent with an equivalent Snellen visual acuity of 0.11 (mean) and 0.28 (maximal) for the left eye and 0.29 (mean) and 0.41 (maximal) for the right eye. The sVEP shows maximal amplitude values in four phases corresponding to Snellen equivalent. Maximal visual acuity and mean visual acuity for the left eye was consistent with 0.28 and 0.11, respectively (B). Maximum visual acuity and mean visual acuity for the right eye was consistent with 0.41 and 0.29, respectively (C).

KLHL7 belongs to the Kelch superfamily, and several proteins belonging to this superfamily act as mediators between E3 ubiquitin ligases and ubiquitinated substrates. It was hypothesized that substitutions in KLHL7 could affect homeostasis by altering ubiquitination of target substrates such as photoreceptor-specific proteins, resulting in inappropriate accumulation of the substrates targeted for proteasomal degradation that could lead to cellular toxicity within the highly metabolically active photoreceptors.<sup>16</sup>

Considering that mono-allelic mutations are responsible for adRP prompted us to review the retinal phenotype in our five probands. Unfortunately, three individuals (CS\_144, CS\_259, CS\_169) died in their first years of life. In CS\_144, the eye examination performed when the proband was 12 months old revealed normal results.

In CS\_258, sister of CS\_259 (both presenting with a CS/CISS1-like phenotype), the eye examination (done at the

age of 6 years) revealed normal cornea, lens, and anterior chamber with bilateral subclinical chorioretinal atrophy and bilateral pale cupping optic discs (Figure 4A). Sweep visual evoked potentials (sVEP) were performed for estimation of visual acuity. VEP represents the response of the visual cortex to visual stimuli, and sVEP has been used as an important technique to measure visual acuity in nonverbal children and malingering individuals. It evaluates visual acuity in a short recording time by obtaining amplitudes in four separate phases and gives an estimated visual acuity with a value corresponding to equivalent Snellen visual acuity. Potentials for mean and maximum visual acuity in both eyes were obtained from sVEP recordings (Figures 4B and 4C). Maximal visual acuity and mean visual acuity for the left eye was consistent with 0.28 and 0.11, respectively (Figure 4B). Maximum visual acuity and mean visual acuity for the right eye was consistent



with 0.41 and 0.29, respectively (Figure 4C). Electroretinography was attempted to be recorded from the proband, but it could not be obtained due to her noncooperation. The eye movements were normal and there was bilateral ptosis of the eyelids. Parents' eye examination (done at 30 years old for the mother and at 34 for the father) revealed no signs of retinal anomaly.

In CS\_260, the result of eye examination (performed at the age of 4 years) was also consistent with pigmented retinopathy/retinal dystrophy (data not shown). Unfortunately, we could not test all the parents for the retinal phenotype because they live in remote villages far away from the reference hospital. Interestingly, there are no retinal problems ascribed so far in individuals with CS/CISS1 or SWS phenotypes associated with *CRLF1* or *LIFR* mutations, respectively. The only known ocular abnormalities in CS/CISS1 case subjects are non-specific "erosive keratitis" and reduced lacrimation with keratitis.<sup>1</sup> Absent corneal reflex, decreased blink reflexes, and corneal opacities are recognized features also of SWS with poor visual outcome.<sup>21,22</sup> Very recently, a case of vitreoretinal pathology has been reported in SWS. It has been hypothesized that *LIFR* mutations may cause intrinsic weakness of the neurosensory retina, predisposing it to injury.<sup>23</sup>

Current evidence establishes CNTF/LIF as potent growth factor agents that can affect retinal neuronal differentiation and survival. The CNTF/LIF signaling pathway regulates developmental programmed cell death and differentiation of rod precursor cells in the mouse retina *in vivo*<sup>24</sup> by the JAK/STAT pathway.<sup>25–27</sup>

A critical evaluation of the retinal phenotype in our two surviving probands revealed early-onset retinitis pigmentosa (before 6 years of age). *KLHL7* mutations could thus show greater severity in recessive than in dominant cases. Although these data further support the pathogenic role of bi-allelic *KLHL7* mutations in a CS/CISS1-like phenotype, they do not explain all their clinical manifestations and highlight the high phenotypic heterogeneity associated to mutations in *KLHL7*. Based on interaction studies reported by Kigoshi et al.,<sup>19</sup> where *KLHL7:WT* and the mutant lacking the Kelch domain are able to bind to *CUL3*, and on our localization data (co-localization of all mutants with *CUL3*), we hypothesize that the loss-of-function mutants identified here in *KLHL7* interfere with recognition and binding to the substrate(s). Thus, bi-allelic mutations in *KLHL7* may lead to complete failure in the ubiquitination of the target substrate(s), resulting in the severe outcome of a Crisponi/CISS1-like phenotype associated with early-onset retinitis pigmentosa (Figure S1). Unfortunately, the substrate(s) bound to *KLHL7* are so far unknown, and our proposed hypothesis is one among several. The disruption of the structural bridges in the Kelch domain could also affect the catalytic E3 activity or the stability of the protein. Therefore, future studies determining the target substrates of *KLHL7* will be of great importance in better understanding the pathophysiologic role of *KLHL7*. Uncovering whether the different proteins such as *KLHL7*, *CRLF1*, *CLCF1*, and

*LIFR* converge functionally to associate with disorders of overlapping phenotype can have important implications in the search for novel disease-associated genes and pharmacological targets.

### Accession Numbers

The four pathogenic variants reported here have been deposited in ClinVar under the following accession numbers: c.1261T>A (p.Cys421Ser), SCV000268116; c.1022delT (p.Leu341Trpfs\*9), SCV000268118; c.1258C>T (p.Arg420Cys), SCV000268117; and c.1115G>A (p.Arg372Gln), SCV000268119.

### Supplemental Data

Supplemental Data include one figure and two tables and can be found with this article online at <http://dx.doi.org/10.1016/j.ajhg.2016.05.026>.

### Acknowledgments

We are grateful to all family members for their participation to the study and to their treating physicians. In particular we thank the following physicians who supplied DNA material and clinical information from individuals with CS/CISS1-like phenotype: Margot Van Allen, Jaime Campos Castello, Francesco Muntoni, Goran Anneren, Fernando Santos, Mohnish Suri, Davide Firinu, Peter Toth-Heyn, Rosario Casalone, Giuseppina Timpani, Maria Teresa Sinelli, Charu Deshpande, Robert Robinson, Adnan Manzur, Arnaud Isapof, Nelida Montano, J. Van Harsse, Livia Garavelli, Paolo Viliani, Cigdem Seher Kasapara, and Irina Snoeck. We thank Prof. Francesco Cucca, director of IRGB-CNR, for his continuous encouragement and support to the study. We are thankful to the CRS4 HPC group for IT support. We thank Prof. Tomoki Chiba, University of Tsukuba, Japan, for kindly providing the HA-CUL3 plasmid used in this study. In particular, we would like to acknowledge the Associazione Sindrome di Crisponi e Malattie Rare for its constant support, encouragement, and active participation both with us and the involved families. This work was supported by TELETHON exploratory grant GEP13093 to L.C., by a grant from the Associazione Sindrome di Crisponi e Malattie Rare, Italy, to L.C., and by a grant from Innovative Medical Research, Münster, Germany, to I.B. and E.R. The funders had no role in study design, data collection and analysis, decision to publish, or preparation of the manuscript.

Received: February 9, 2016

Accepted: May 19, 2016

Published: July 7, 2016

### Web Resources

1000 Genomes, <http://www.1000genomes.org>  
ClinGen, <https://www.clinicalgenome.org/>  
ClinVar, <https://www.ncbi.nlm.nih.gov/clinvar/>  
dbSNP, <http://www.ncbi.nlm.nih.gov/projects/SNP/>  
dbNSFP v.2.0, <https://sites.google.com/site/jpopgen/dbNSFP>  
ExAC Browser, <http://exac.broadinstitute.org/>  
GenBank, <http://www.ncbi.nlm.nih.gov/genbank/>  
Geno2MP, <http://geno2mp.gs.washington.edu/Geno2MP/#/>  
NHLBI Exome Sequencing Project (ESP) Exome Variant Server, <http://evs.gs.washington.edu/EVS/>

OMIM, <http://www.omim.org/>  
RCSB Protein Data Bank, <http://www.rcsb.org/pdb/home/home.do>  
The Human Protein Atlas, <http://www.proteinatlas.org/>  
UniProt, <http://www.uniprot.org/>

## References

1. Crisponi, L., Crisponi, G., Meloni, A., Toliati, M.R., Nurnberg, G., Usala, G., Uda, M., Masala, M., Hohne, W., Becker, C., et al. (2007). Crisponi syndrome is caused by mutations in the CRLF1 gene and is allelic to cold-induced sweating syndrome type 1. *Am. J. Hum. Genet.* *80*, 971–981.
2. Dagoneau, N., Bellais, S., Blanchet, P., Sarda, P., Al-Gazali, L.I., Di Rocco, M., Huber, C., Djouadi, F., Le Goff, C., Munnich, A., and Cormier-Daire, V. (2007). Mutations in cytokine receptor-like factor 1 (CRLF1) account for both Crisponi and cold-induced sweating syndromes. *Am. J. Hum. Genet.* *80*, 966–970.
3. Forger, N.G., Prevette, D., deLapeyrière, O., de Bovis, B., Wang, S., Bartlett, P., and Oppenheim, R.W. (2003). Cardiotrophin-like cytokine/cytokine-like factor 1 is an essential trophic factor for lumbar and facial motoneurons in vivo. *J. Neurosci.* *23*, 8854–8858.
4. Heinrich, P.C., Behrmann, I., Haan, S., Hermanns, H.M., Müller-Newen, G., and Schaper, F. (2003). Principles of interleukin (IL)-6-type cytokine signalling and its regulation. *Biochem. J.* *374*, 1–20.
5. Piras, R., Chiappe, F., Torraca, I.L., Buers, I., Usala, G., Angius, A., Akin, M.A., Basel-Vanagaite, L., Benedicenti, F., Chiodin, E., et al. (2014). Expanding the mutational spectrum of CRLF1 in Crisponi/CISS1 syndrome. *Hum. Mutat.* *35*, 424–433.
6. Cuccuru, G., Orsini, M., Pinna, A., Sbardellati, A., Soranzo, N., Travaglione, A., Uva, P., Zanetti, G., and Fotia, G. (2014). Orione, a web-based framework for NGS analysis in microbiology. *Bioinformatics* *30*, 1928–1929.
7. Li, H., and Durbin, R. (2009). Fast and accurate short read alignment with Burrows-Wheeler transform. *Bioinformatics* *25*, 1754–1760.
8. McKenna, A., Hanna, M., Banks, E., Sivachenko, A., Cibulskis, K., Kernytzky, A., Garimella, K., Altshuler, D., Gabriel, S., Daly, M., and DePristo, M.A. (2010). The Genome Analysis Toolkit: a MapReduce framework for analyzing next-generation DNA sequencing data. *Genome Res.* *20*, 1297–1303.
9. Van der Auwera, G.A., Carneiro, M.O., Hartl, C., Poplin, R., Del Angel, G., Levy-Moonshine, A., Jordan, T., Shakir, K., Roazen, D., Thibault, J., et al. (2002). *Current Protocols in Bioinformatics* (Hoboken, NJ: John Wiley & Sons, Inc.).
10. Cingolani, P., Patel, V.M., Coon, M., Nguyen, T., Land, S.J., Ruden, D.M., and Lu, X. (2012). Using *Drosophila melanogaster* as a model for genotoxic chemical mutational studies with a new program, SnpSift. *Front. Genet.* *3*, 35.
11. Li, M.-X., Gui, H.-S., Kwan, J.S.H., Bao, S.-Y., and Sham, P.C. (2012). A comprehensive framework for prioritizing variants in exome sequencing studies of Mendelian diseases. *Nucleic Acids Res.* *40*, e53.
12. Fuentes Fajardo, K.V., Adams, D., Mason, C.E., Sincan, M., Tiffit, C., Toro, C., Boerkoel, C.F., Gahl, W., and Markello, T.; NISC Comparative Sequencing Program (2012). Detecting false-positive signals in exome sequencing. *Hum. Mutat.* *33*, 609–613.
13. Liu, X., Jian, X., and Boerwinkle, E. (2013). dbNSFP v2.0: a database of human non-synonymous SNVs and their functional predictions and annotations. *Hum. Mutat.* *34*, E2393–E2402.
14. Magi, A., Tattini, L., Palombo, F., Benelli, M., Gialluisi, A., Giusti, B., Abbate, R., Seri, M., Gensini, G.F., Romeo, G., and Pippucci, T. (2014). H3M2: detection of runs of homozygosity from whole-exome sequencing data. *Bioinformatics* *30*, 2852–2859.
15. Krumm, N., Sudmant, P.H., Ko, A., O’Roak, B.J., Malig, M., Coe, B.P., Quinlan, A.R., Nickerson, D.A., and Eichler, E.E.; NHLBI Exome Sequencing Project (2012). Copy number variation detection and genotyping from exome sequence data. *Genome Res.* *22*, 1525–1532.
16. Friedman, J.S., Ray, J.W., Waseem, N., Johnson, K., Brooks, M.J., Hugosson, T., Breuer, D., Branham, K.E., Krauth, D.S., Bowne, S.J., et al. (2009). Mutations in a BTB-Kelch protein, KLHL7, cause autosomal-dominant retinitis pigmentosa. *Am. J. Hum. Genet.* *84*, 792–800.
17. Hugosson, T., Friedman, J.S., Ponjavic, V., Abrahamson, M., Swaroop, A., and Andréasson, S. (2010). Phenotype associated with mutation in the recently identified autosomal dominant retinitis pigmentosa KLHL7 gene. *Arch. Ophthalmol.* *128*, 772–778.
18. Wen, Y., Locke, K.G., Hood, D.C., and Birch, D.G. (2011). Rod photoreceptor temporal properties in retinitis pigmentosa. *Exp. Eye Res.* *92*, 202–208.
19. Kigoshi, Y., Tsuruta, F., and Chiba, T. (2011). Ubiquitin ligase activity of Cul3-KLHL7 protein is attenuated by autosomal dominant retinitis pigmentosa causative mutation. *J. Biol. Chem.* *286*, 33613–33621.
20. Bredholt, G., Storstein, A., Haugen, M., Krossnes, B.K., Husebye, E., Knappskog, P., and Vedeler, C.A. (2006). Detection of autoantibodies to the BTB-kelch protein KLHL7 in cancer sera. *Scand. J. Immunol.* *64*, 325–335.
21. Di Rocco, M., Stella, G., Bruno, C., Doria Lamba, L., Bado, M., and Superti-Furga, A. (2003). Long-term survival in Stuve-Wiedemann syndrome: a neuro-myo-skeletal disorder with manifestations of dysautonomia. *Am. J. Med. Genet. A.* *118A*, 362–368.
22. Injarie, A.M., Narang, A., Idrees, Z., Saggar, A.K., and Nischal, K.K. (2012). Ocular treatment of children with Stuve-Wiedemann syndrome. *Cornea* *31*, 269–272.
23. Palejwala, N.V., Stempel, A.J., and Stout, J.T. (2015). Bilateral giant retinal tears in a pediatric patient with leukemia inhibitory factor receptor deficiency (Stuve-Wiedemann syndrome). *Retin. Cases Brief Rep.* *9*, 245–247.
24. Elliott, J., Cayouette, M., and Gravel, C. (2006). The CNTF/LIF signaling pathway regulates developmental programmed cell death and differentiation of rod precursor cells in the mouse retina in vivo. *Dev. Biol.* *300*, 583–598.
25. Ozawa, S., Ishikawa, K., Ito, Y., Nishihara, H., Yamakoshi, T., Hatta, Y., and Terasaki, H. (2009). Differences in macular morphology between polypoidal choroidal vasculopathy and exudative age-related macular degeneration detected by optical coherence tomography. *Retina* *29*, 793–802.
26. Rhee, K.D., Goureau, O., Chen, S., and Yang, X.J. (2004). Cytokine-induced activation of signal transducer and activator of transcription in photoreceptor precursors regulates rod differentiation in the developing mouse retina. *J. Neurosci.* *24*, 9779–9788.
27. Zhang, S.S.-M., Wei, J., Qin, H., Zhang, L., Xie, B., Hui, P., Deisseroth, A., Barnstable, C.J., and Fu, X.-Y. (2004). STAT3-mediated signaling in the determination of rod photoreceptor cell fate in mouse retina. *Invest. Ophthalmol. Vis. Sci.* *45*, 2407–2412.

**Supplemental Data**

**Bi-allelic Mutations in *KLHL7* Cause  
a Crisponi/CISS1-like Phenotype Associated  
with Early-Onset Retinitis Pigmentosa**

**Andrea Angius, Paolo Uva, Insa Buers, Manuela Oppo, Alessandro Puddu, Stefano Onano, Ivana Persico, Angela Loi, Loredana Marcia, Wolfgang Höhne, Gianmauro Cuccuru, Giorgio Fotia, Manila Deiana, Mara Marongiu, Hatice Tuba Atalay, Sibel Inan, Osama El Assy, Leo M.E. Smit, Ilyas Okur, Koray Boduroglu, Gülen Eda Utine, Esra Kılıç, Giuseppe Zampino, Giangiorgio Crisponi, Laura Crisponi, and Frank Rutsch**

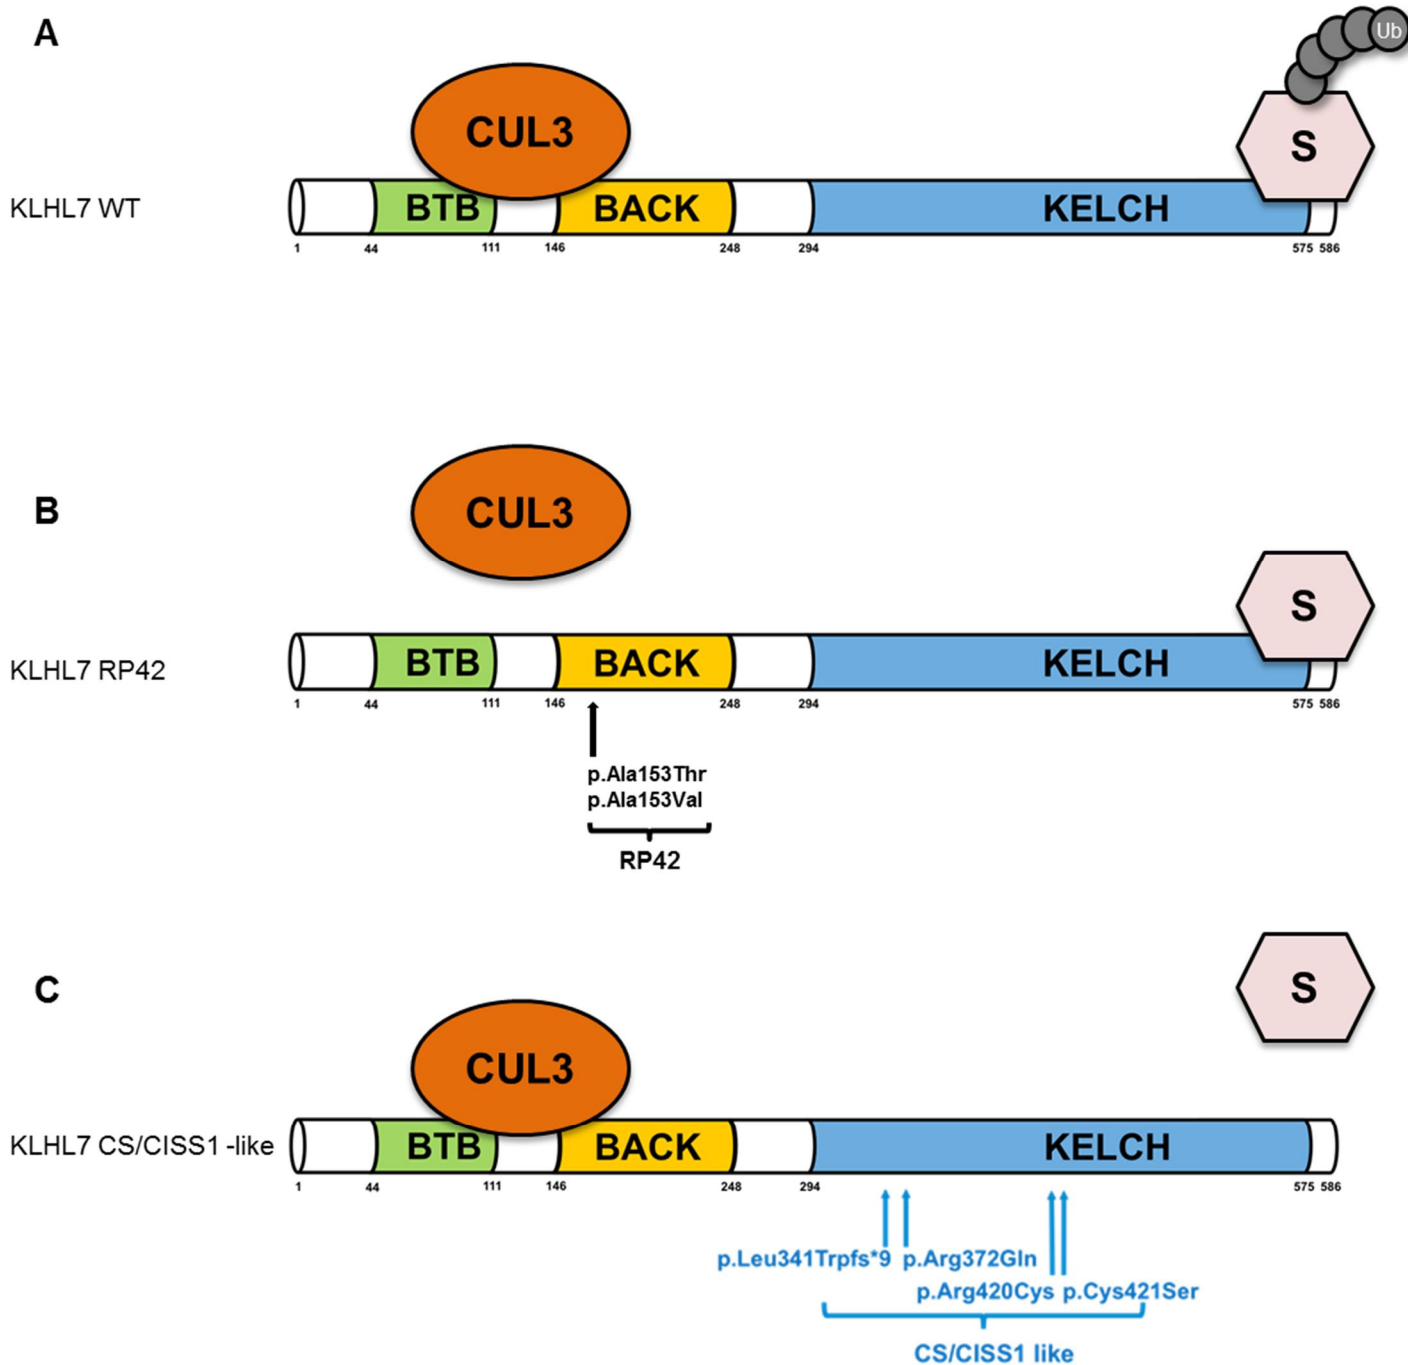

**Figure S1: Proposed pathomechanism of KLHL7 mutations in adRP and Crisponi/CISS1-like phenotype.** (A) In KLHL7 WT, CUL3 binds to the protein via the BTB/BACK domain and the target substrate(s) that bind to the Kelch domain are ubiquitinated and degraded by proteasome. (B) In KLHL7 mutated in adRP, CUL3 does not bind to the protein, and the target substrate(s) that bind to the Kelch domain are not ubiquitinated and accumulate. (C) In KLHL7 mutated in CS/CISS1 like, CUL3 binds to the protein while the target substrate(s) could not bind to the Kelch domain and are not ubiquitinated and accumulate.

**Table S1. Number of variants identified in the whole exome sequencing.**

|                                                                                                                                                | <b>CS - Fam C</b> | <b>CS - Fam F</b> | <b>CS - Fam G</b> |
|------------------------------------------------------------------------------------------------------------------------------------------------|-------------------|-------------------|-------------------|
| <b>Annotated variants</b>                                                                                                                      | 178148            | 194431            | 127389            |
| <b>Total high quality variants in the family<br/>(GATK Hard Filters PASS Variants)</b>                                                         | 165377            | 174850            | 118995            |
| <b>Filtered by MAF</b>                                                                                                                         | 19226             | 22314             | 11023             |
| <b>Filtered by feature<br/>(frameshift - nonframeshift - startloss -<br/>stoploss - stopgain - splicing2bp -<br/>missense - 3'UTR - 5'UTR)</b> | 7397              | 7800              | 4246              |
| <b>Filtered by feature (No UTRs)</b>                                                                                                           | 1792              | 1946              | 941               |
| <b>Filtered by autosomal recessive model</b>                                                                                                   | 80                | 42                | 250               |
| <b>Recessive homozygotes</b>                                                                                                                   | 50                | 27                | 82                |
| <b>Heterozygous compound</b>                                                                                                                   | 30                | 15                | 168               |
| <b>Filtered by false positives</b>                                                                                                             | 68                | 37                | 202               |
| <b>Novel variants (No rs)</b>                                                                                                                  | 20                | 12                | 52                |
| <b>Candidate gene(s)</b>                                                                                                                       | 1                 | 1                 | 1                 |

**Table S2. Pathogenicity score of the three missense mutations found**

| <b>Family code</b>        | <b>CS Ę Fam C</b>        | <b>CS Ę Fam G</b> | <b>CS Ę Fam L</b> |
|---------------------------|--------------------------|-------------------|-------------------|
| <b>Proband code</b>       | CS_144                   | CS_260            | CS_169            |
| <b>Chromosome</b>         | 7:23207538               | 7:23207535        | 7:23205495        |
| <b>Gene</b>               | <i>KLHL7</i>             | <i>KLHL7</i>      | <i>KLHL7</i>      |
| <b>DNA change</b>         | c.1261T>A                | c.1258C>T         | c.1115G>A         |
| <b>aa change</b>          | p.Cys421Ser              | p.Arg420Cys       | p.Arg372Gln       |
| <b>dbSNP (rsID)</b>       | no rs                    | rs780705654       | no rs             |
| <b>SIFT</b>               | Tolerated                | Damaging          | Damaging          |
| <b>PolyPhen-HDIV_pred</b> | Probably damaging/Benign | Probably damaging | Probably damaging |
| <b>PolyPhen-HVAR_pred</b> | Probably damaging/Benign | Probably damaging | Probably damaging |
| <b>LRT</b>                | Damaging                 | Damaging          | Damaging          |
| <b>MutationTaster</b>     | Disease causing          | Disease causing   | Disease causing   |
| <b>MutationAssessor</b>   | Neutral                  | High              | Medium            |
| <b>FATHMM</b>             | Tolerated                | Deleterious       | Tolerated         |
